# Supplementary material
Source: publisher figshare collection journal article supplement (https://sage.figshare.com/ndownloader/files/23117231)
Supplement: Supplementary file 1 [file 23117231]

**Supplemental Information:**

**Rapid Neoglaciation on Ellesmere Island Promoted by Enhanced Summer Snowfall in a Transient Climate Model Simulation of the Middle-Late Holocene**

Stephen J. Vavrus, Feng He, John E. Kutzbach, William F. Ruddiman


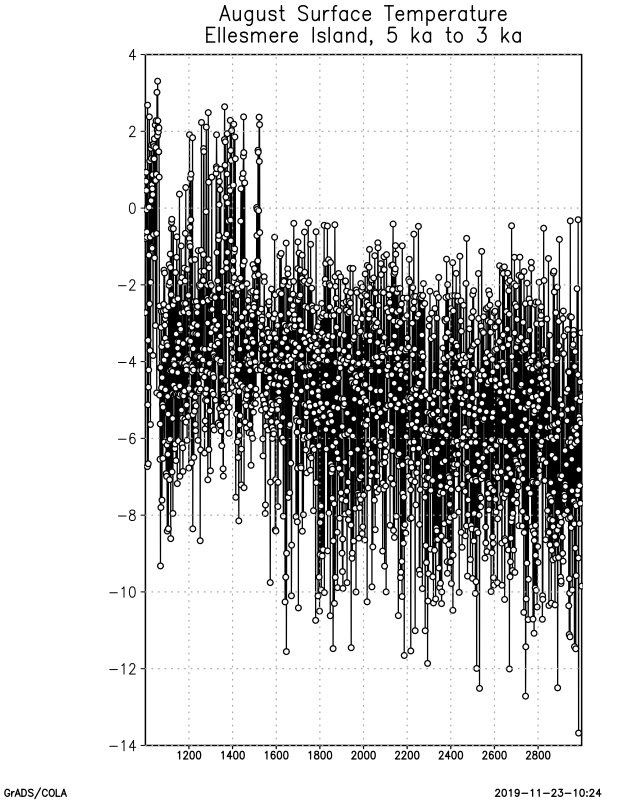


5 4.8 4.6 4.4 4.2 4 3.8 3.6 3.4 3.2 3

Figure S3. August surface temperature (oC) on Ellesmere Island (78oN, 80oW) from

5 ka to 3 ka.
